# Supplementary material for: Functional Annotation of Proteomic Data from Chicken Heterophils and Macrophages Induced by Carbon Nanotube Exposure
Source: MDPI journal article supplement (doi:10.3390/ijms15058372), 2014-05-12
Supplement: s1 [file s1]

## Supplementary Information

**Table S1.** List of differentially expressed chicken macrophages proteins after treated with carbon nanotube identified by peptide mass fingerprinting.

| Spot No. <sup>a</sup> | Protein Identity                                                    | GeneBank Accession | Source Species       | MALDI-MS/PMF <sup>b</sup> | Score | Theoretical Mr/pI | MALDI-TOF/TOF <sup>c</sup> | Functional Classification                                           | Subcellular Location |
|-----------------------|---------------------------------------------------------------------|--------------------|----------------------|---------------------------|-------|-------------------|----------------------------|---------------------------------------------------------------------|----------------------|
| M27                   | Protein MRP-126                                                     | gi 126659          | <i>Gallus gallus</i> | NS                        | -     | 14,172/6.44       | 1 (84) 84                  | Calcium ion binding (ion binding)                                   | Cytoplasm            |
|                       | similar to                                                          |                    |                      |                           |       |                   |                            |                                                                     |                      |
| M30                   | D4-GDP-dissociation inhibitor                                       | gi 50728568        | <i>Gallus gallus</i> | NS                        | -     | 22,929/5.08       | 4 (93, 63, 12) 167         | Rho GDP-dissociation inhibitor activity (enzyme regulator activity) | Cytoplasm            |
|                       | similar to                                                          |                    |                      |                           |       |                   |                            |                                                                     |                      |
| M57                   | hepatoma-derived growth factor (high-mobility group protein 1-like) | gi 118107483       | <i>Gallus gallus</i> | 9/58 (49)                 | 97    | 20,684/4.80       | 2 (19, 66) 79              | Growth factor activity (protein binding)                            | Cytoplasm            |
| M69                   | high mobility group protein HMG1                                    | gi 5815432         | <i>Gallus gallus</i> | 2/20 (21)                 | 68    | 24,952/5.75       | 5 (69, 56, 82, 105) 310    | Cytokine activity (protein binding)                                 | Cytoplasm            |
| M94                   | similar to Pdlim1 protein isoform 1                                 | gi 118092685       | <i>Gallus gallus</i> | 15/66 (66)                | 131   | 36,094/7.00       | 1 (59) 59                  | Zinc ion binding (ion binding)                                      | Nucleus              |
| M107                  | adenosine deaminase                                                 | gi 57529377        | <i>Gallus gallus</i> | 20/62 (84)                | 168   | 41,052/5.80       | 3 (53, 30, 25) 109         | Adenosine deaminase activity (catalytic activity)                   | Cytoplasm            |
| M108                  | actin, cytoplasmic type 5                                           | gi 56119084        | <i>Gallus gallus</i> | 25/86 (50)                | 131   | 42,157/5.30       | 2 (61, 130) 191            | Identical protein binding (protein binding)                         | Cytoskeleton         |
| M109                  | beta-actin                                                          | gi 63018           | <i>Gallus gallus</i> | 17/40 (49)                | 157   | 42,086/5.29       | 3 (40, 79, 108) 226        | Protein binding                                                     | Cytoskeleton         |
| M140                  | heat shock protein 70                                               | gi 30962014        | <i>Gallus gallus</i> | 35/130 (36)               | 90    | 70,098/5.50       | 3 (17, 50, 75) 142         | Protein binding                                                     | Cell surface         |
| M153                  | phosphoglycerate kinase                                             | gi 45384486        | <i>Gallus gallus</i> | 18/104 (47)               | 78    | 45,087/9.20       | 2 (139, 60) 199            | Phosphoglycerate kinase activity (catalytic activity)               | Cytoplasm            |
| M156                  | NS                                                                  | -                  | -                    | NS                        | -     | -                 | -                          | -                                                                   | -                    |
| M199                  | NS                                                                  | -                  | -                    | NS                        | -     | -                 | -                          | -                                                                   | -                    |

<sup>a</sup> The spot numbers refers to the numbers labeled on Figure 2; <sup>b</sup> The column refers to the results of the MALDI-MS analysis, *i.e.*, the number of assigned and percent sequence coverage (in brackets); <sup>c</sup> The column refers to the results of the MALDI-TOF/TOF analysis, *i.e.*, to the summary score and Mowse scores (in brackets) of assigned peptides; NS: no significant match in the database.

**Table S2.** List of differentially expressed chicken heterophils proteins after treated with carbon nanotube identified by peptide mass fingerprinting.

| Spot No. <sup>a</sup> | Protein Identity                                   | GeneBank Accession | Source Species                     | MALDI-MS/PMF <sup>b</sup> | Score  | Theoretical Mr/pI | MALDI-TOF/TOF <sup>c</sup> | Functional Classification                             | Subcellular Location |
|-----------------------|----------------------------------------------------|--------------------|------------------------------------|---------------------------|--------|-------------------|----------------------------|-------------------------------------------------------|----------------------|
| H60                   | gelsolin precursor                                 | gi 45384386        | <i>Gallus gallus</i>               | 10/58 (36)                | 86/74  | 86,120/5.90       | 2 (20, 29) 49/45           | Actin binding (protein binding)                       | Cytoplasm            |
| H78                   | peptidylprolyl isomerase A (cyclophilin A)         | gi 261490820       | <i>Gallus gallus</i>               | 11/72 (50)                | 74/74  | 18,084/9.50       | 2 (56, 68) 125/43          | Peptide binding (binding)                             | Cytoplasm            |
| H80                   | recombination activating protein 1                 | gi 241994242       | <i>Ochthoeca cinnamomeiventris</i> | 18/76 (26)                | 85/74  | 112,026/8.83      | NS                         | Histone binding (protein binding)                     | Nucleus              |
| H87                   | Hypothetical protein                               | gi 118102987       | <i>Gallus gallus</i>               | NS                        | 79/74  | 62,606/5.00       | 1 (102) 102/45             | NS                                                    | NS                   |
| H118                  | aconitate hydratase, mitochondrial                 | gi 45383738        | <i>Gallus gallus</i>               | 24/75 (39)                | 153/74 | 86,535/8.89       | 2 (23, 23) 46/45           | Iron ion binding (ion binding)                        | Mitochondrion        |
| H123                  | moesin-like                                        | gi 326924179       | <i>Meleagris gallopavo</i>         | 29/81 (44)                | 137/74 | 68,220/5.90       | 3 (39, 42, 21) 103/45      | Cell adhesion molecule binding (protein binding)      | Cytoskeleton         |
| H143                  | moesin-like                                        | gi 326924179       | <i>Meleagris gallopavo</i>         | 19/67 (27)                | 98/74  | 68,220/5.90       | -                          | Cell adhesion molecule binding (protein binding)      | Cytoskeleton         |
| H156                  | cell division control protein 42 homolog precursor | gi 45384262        | <i>Gallus gallus</i>               | NS                        | NS     | 21,601/6.15       | 2 (35, 64) 99/45           | GTP binding (binding)                                 | Cytoplasm            |
| H161                  | phosphoglycerate mutase 1                          | gi 71895985        | <i>Gallus gallus</i>               | 9/39 (50)                 | 82/74  | 29,051/7.80       | 1 (38) 38/44               | Phosphoglycerate mutase activity (catalytic activity) | Cytoplasm            |

Table 2. Cont.

| Spot No. <sup>a</sup> | Protein Identity                          | GeneBank Accession | Source Species       | MALDI-MS/PMF <sup>b</sup> | Score  | Theoretical Mr/pI | MALDI-TOF/TOF <sup>c</sup> | Functional Classification                                                                       | Subcellular Location |
|-----------------------|-------------------------------------------|--------------------|----------------------|---------------------------|--------|-------------------|----------------------------|-------------------------------------------------------------------------------------------------|----------------------|
| H164                  | glyceraldehyde-3-phosphate dehydrogenase  | gi 46048961        | <i>Gallus gallus</i> | 16/74 (20)                | 82/74  | 35,909/9.40       | 2 (91, 60) 151/45          | Glyceraldehyde-3-phosphate dehydrogenase (NAD+) (phosphorylating) activity (catalytic activity) | Cytoplasm            |
| H172                  | peptidyl-prolyl cis-trans isomerase FKBP4 | gi 57525441        | <i>Gallus gallus</i> | 10/18 (43)                | 131/74 | 50,742/5.40       | 2 (54, 2) 56/44            | Heat shock protein binding (protein binding)                                                    | Nucleus              |
| H188                  | beta-actin                                | gi 63018           | <i>Gallus gallus</i> | NS                        | NS     | 42,086/5.29       | 3 (23, 55, 11) 88/44       | Protein binding                                                                                 | Cytoskeleton         |
| H195                  | hypothetical protein RCJMB04_1a14         | gi 53126140        | <i>Gallus gallus</i> | 16/54 (25)                | 101/74 | 86,394/8.90       | NS                         | Iron ion binding (ion binding)                                                                  | Mitochondrion        |
| H219                  | phosphoglycerate kinase                   | gi 45384486        | <i>Gallus gallus</i> | NS                        | 108/74 | 45,094/8.31       | 2 (40, 36) 76/44           | Phosphoglycerate kinase activity (catalytic activity)                                           | Cytoplasm            |
| H220                  | similar to transketolase                  | gi 118096822       | <i>Gallus gallus</i> | 20/72 (41)                | 139/74 | 69,152/7.90       | 2 (67, 37) 103/45          | Magnesium ion binding (ion binding)                                                             | Cytoplasm            |

<sup>a</sup> The spot numbers refers to the numbers labeled on Figure 4; <sup>b</sup> The column refers to the results of the MALDI-MS analysis, *i.e.*, the number of assigned and percent sequence coverage (in brackets); <sup>c</sup> The column refers to the results of the MALDI-TOF/TOF analysis, *i.e.*, to the summary score and Mowse scores (in brackets) of assigned peptides; NS: no significant match in the database.
